# Supplementary material for: Teeth Tales: a community-based child oral health promotion trial with migrant families in Australia
Source: HighWire-hosted journal article supplement (doi:10.1136/bmjopen-2014-007321), 2015-06-01
Supplement: bmjopen-2014-007321supp_figures.pdf [file bmjopen-2014-007321supp_figures.pdf]

## Supplementary Figures

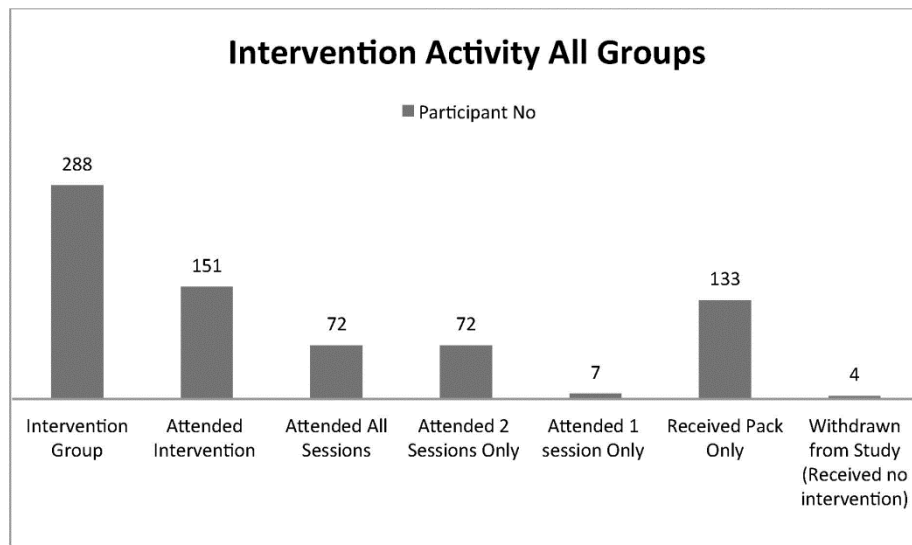

Supplementary file - Figure a: Intervention dose

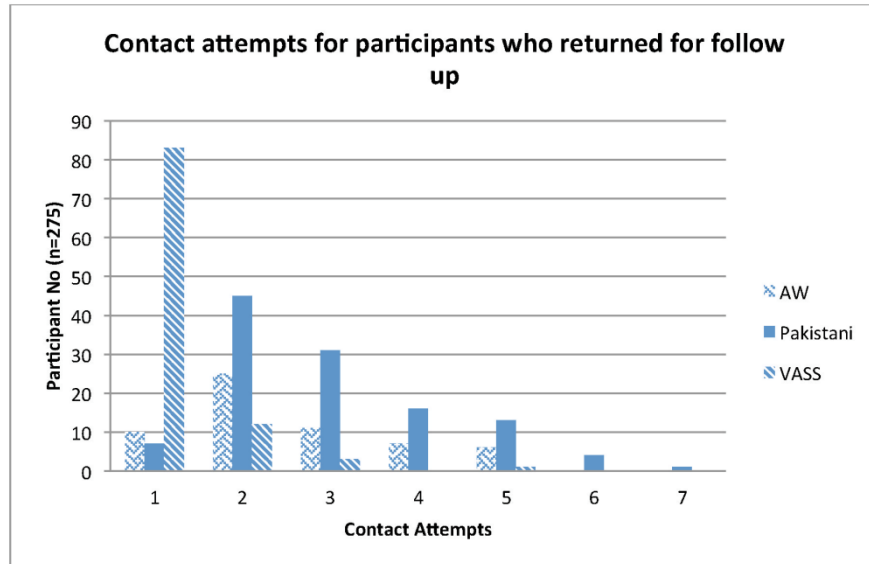

Supplementary file - Figure b: Contact attempts for participants who returned to follow up
